# Supplementary material for: Mitochondrial impairment and downregulation of Drp1 phosphorylation underlie the antiproliferative and proapoptotic effects of alantolactone on oral squamous cell carcinoma cells
Source: Springer Nature journal article supplement (doi:10.1186/s12967-023-04188-2), 2023-05-18

**A**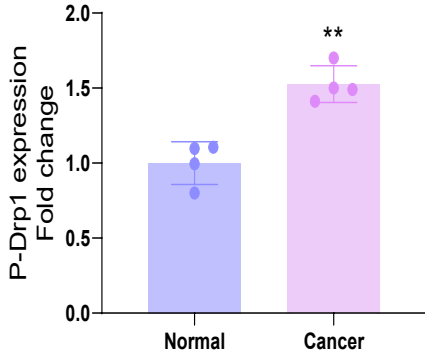**B**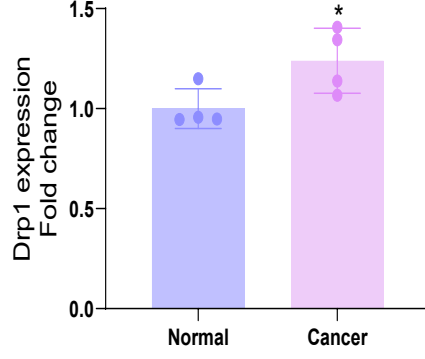**C**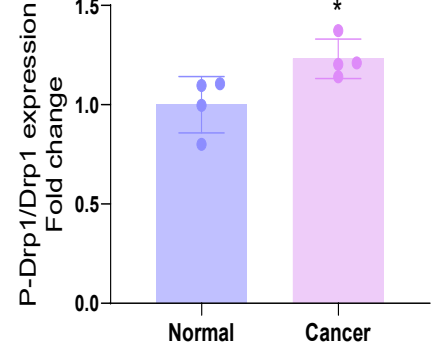**D**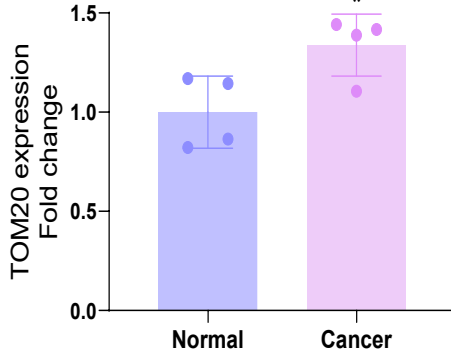**E**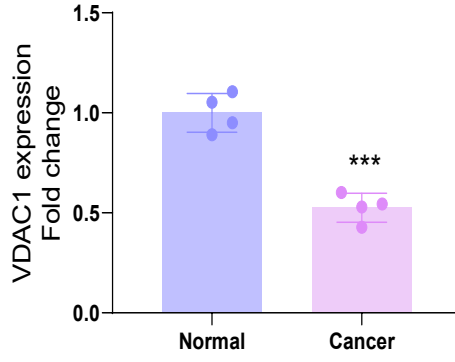

Supplement: MOESM1 [file 25378510]
